# Supplementary material for: Plasma Vitamin B12 and Folate Alter the Association of Blood Lead and Cadmium and Total Urinary Arsenic Levels with Chronic Kidney Disease in a Taiwanese Population
Source: Nutrients. 2021 Oct 28;13(11):3841. doi: 10.3390/nu13113841 (PMC8625054; doi:10.3390/nu13113841)
Supplement: Supplementary file 1 [file nutrients-13-03841-s001.zip › nutrients-1406267 supplementary.pdf]

(A)

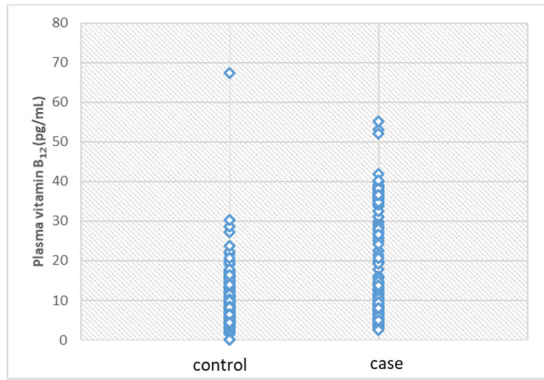

(B)

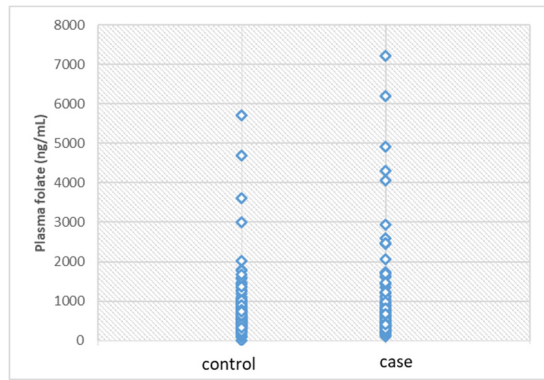

(C)

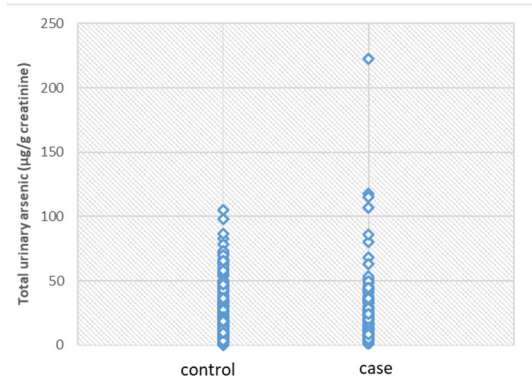

(D)

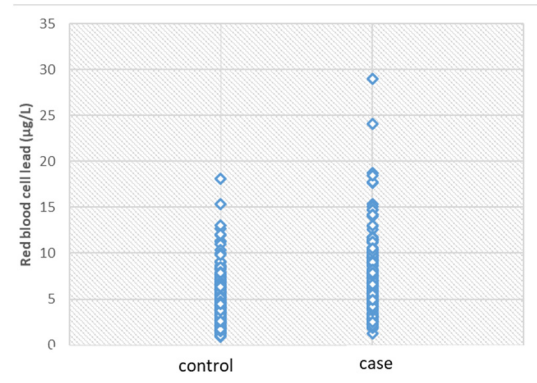

(E)

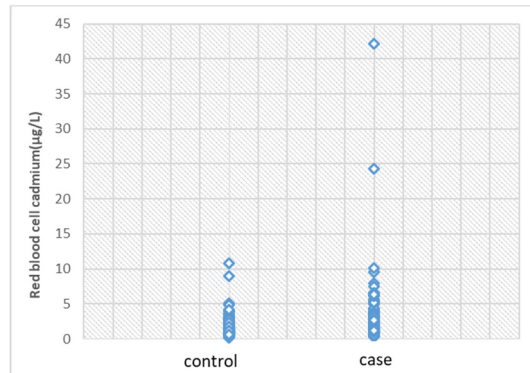

**Supplementary Figure S1.** The dot plots of measured variables by CKD status. (A) Plasma vitamin B<sub>12</sub> (pg/mL) (B) Plasma folate (ng/mL) (C) Total urinary arsenic (µg/g creatinine) (D) Red blood cell lead (µg/L) (E) Red blood cell cadmium (µg/L).

## Supplementary Tables

**Supplementary Table S1.** Validity and reliability of measurements used for determining urinary arsenic and plasma selenium, folate, and vitamin B<sub>12</sub> as well as red blood cell lead and cadmium concentrations.

| Metals or metalloids                       | Instrument                                                                                                                                          | Detection limit (µg/L)                                        | Recovery rate | Standard reference materials (SRM)                                                                                                                                              | Coefficient of variance (CV)                                 |
|--------------------------------------------|-----------------------------------------------------------------------------------------------------------------------------------------------------|---------------------------------------------------------------|---------------|---------------------------------------------------------------------------------------------------------------------------------------------------------------------------------|--------------------------------------------------------------|
| Plasma folate and vitamin B <sub>12</sub>  | Radioassay kit (Bio-Rad, Richmond, CA, USA) and the 1470 Wizard series gamma counter                                                                | 0.6 for plasma folate<br>75 pg/mL for vitamin B <sub>12</sub> |               |                                                                                                                                                                                 | Plasma folate: 9.3%<br>Plasma vitamin B <sub>12</sub> : 6.8% |
| Red blood cell lead                        | Inductively coupled plasma mass spectrometry                                                                                                        | 0.32                                                          | 100% ± 20%    | SRM (Seronorm Trace Elements Whole Blood L-2 (Lot 1103129)) certificate value 310.0 µg/L (range: 186.0–434.0 µg/L); 329.0 ± 17.0 µg/L in our system                             | <5%                                                          |
| Red blood cell cadmium                     | Inductively coupled plasma mass spectrometry                                                                                                        | 0.07                                                          | 100% ± 20%    | SRM (Seronorm Trace Elements Whole Blood L-2 (Lot 1103129)) certificate value 5.8 µg/L (range: 5.4–6.2 µg/L); 6.1 ± 0.5 µg/L in our system                                      | <5%                                                          |
| Arsenite (As <sup>III</sup> )              | High-performance liquid chromatography–hydride generator–atomic absorption spectrometry                                                             | 0.02                                                          | 93.8%–102.2%  | SRM [National Institute of Standards and Technology (NIST, Gaithersburg, MD, USA)] 2670 certificate value 480 ± 100 µg/L inorganic arsenic; in our system 507 ± 17 µg/L (n = 4) | <10%                                                         |
| Arsenate (As <sup>V</sup> )                |                                                                                                                                                     | 0.10                                                          |               |                                                                                                                                                                                 |                                                              |
| Monomethylarsonic acid (MMA <sup>V</sup> ) |                                                                                                                                                     | 0.07                                                          |               |                                                                                                                                                                                 |                                                              |
| Dimethylarsinic acid (DMA <sup>V</sup> )   |                                                                                                                                                     | 0.06                                                          |               |                                                                                                                                                                                 |                                                              |
| Urinary creatinine level                   | A colorimetric assay. The creatinine–picric acid complex formed from creatinine and picric acid was measured using a Roche Modular P800 instrument. |                                                               |               |                                                                                                                                                                                 |                                                              |

**Supplementary Table S2.** Association of levels of total urinary arsenic and blood cadmium and lead with CKD stratified by B<sub>12</sub> levels.

| Plasma vitamin B <sub>12</sub> level ≤ 7.76 pg/mL |              |                               |                                  | Plasma vitamin B <sub>12</sub> level > 7.76 pg/mL |              |                               |                                  |
|---------------------------------------------------|--------------|-------------------------------|----------------------------------|---------------------------------------------------|--------------|-------------------------------|----------------------------------|
| Variable                                          | Case/Control | Age-sex adjusted ORs (95% CI) | Multivariate adjusted OR (95%CI) | Variable                                          | Case/Control | Age-sex adjusted ORs (95% CI) | Multivariate adjusted OR (95%CI) |
| Total urinary arsenic (µg/g creatinine)           |              |                               |                                  | Total urinary arsenic (µg/g creatinine)           |              |                               |                                  |
| ≤11.91                                            | 17/75        | 1.00 <sup>§</sup>             | 1.00 <sup>a</sup>                | ≤12.07                                            | 53/76        | 1.00                          | 1.00 <sup>a</sup>                |
| 11.91–21.80                                       | 27/77        | 1.55 (0.77–3.09)              | 1.03 (0.41–2.58)                 | 12.07–23.01                                       | 36/66        | 0.78 (0.45–1.33)              | 0.87 (0.39–1.96)                 |
| >21.80                                            | 54/76        | 3.13 (1.63–6.00)**            | 1.94 (0.81–4.69)                 | >23.01                                            | 33/68        | 0.68 (0.39–1.18)              | 0.65 (0.28–1.49)                 |
| Red blood cell lead (µg/L)                        |              |                               |                                  | Red blood cell lead (µg/L)                        |              |                               |                                  |
| ≤28.06                                            | 8/75         | 1.00 <sup>§</sup>             | 1.00 <sup>b§</sup>               | ≤27.76                                            | 12/70        | 1.00 <sup>§</sup>             | 1.00 <sup>b§</sup>               |
| 28.06–49.08                                       | 24/77        | 3.05(1.28–7.27)*              | 3.01 (0.99–9.19)                 | 27.76–44.34                                       | 26/71        | 2.25(1.04–4.84)*              | 1.30 (0.44–3.88)                 |
| >49.08                                            | 66/76        | 8.75 (3.85–19.86)**           | 7.12 (2.44–20.75)**              | >44.34                                            | 84/69        | 7.69 (3.79–15.61)**           | 3.74(1.34–10.46)**               |
| Red blood cell cadmium (µg/L)                     |              |                               |                                  | Red blood cell cadmium (µg/L)                     |              |                               |                                  |
| ≤0.82                                             | 7/78         | 1.00 <sup>§</sup>             | 1.00 <sup>b§</sup>               | ≤0.74                                             | 10/70        | 1.00 <sup>§</sup>             | 1.00 <sup>b§</sup>               |
| 0.82–1.32                                         | 24/76        | 3.75 (1.50–9.34)**            | 3.13 (0.98–10.00)                | 0.74–1.26                                         | 27/72        | 2.98 (1.32–6.73)**            | 4.19 (1.25–14.00)*               |
| >1.32                                             | 67/74        | 10.88 (4.58–25.83)**          | 9.28 (2.87–29.96)**              | >1.26                                             | 85/68        | 10.47 (4.88–22.47)**          | 10.77 (3.19–36.33)**             |

<sup>a</sup>Adjusted for sex; age; educational level; alcohol, coffee, and tea consumption; analgesic use; diabetes; hypertension; and red blood cell lead and cadmium levels.

<sup>b</sup>Adjusted for sex; age; educational level; alcohol, coffee, and tea consumption; analgesic use; diabetes; hypertension; and levels of urinary creatinine, total urinary arsenic (µg/L), and red blood cell lead or cadmium.

\**P* < 0.05, \*\**P* < 0.01, and <sup>§</sup>*P* < 0.05 for the trend test.
